# Supplementary material for: A vitamin C fuel cell with a non-bonded cathodic interface
Source: Royal Society of Chemistry journal article supplement (doi:10.1039/c8se00221e), 2018-01-01
Supplement: c8se00221e1.pdf [file c8se00221e1.pdf]

## **A Vitamin C Fuel Cell with a Non-bonded Cathodic Interface**

Mruthyunjayachari Chattanahalli Devendrachari,<sup>a,b</sup> Ravikumar Thimmappa,<sup>a</sup> Zahid Manzoor Bhat,<sup>a</sup> Shahid Pottachola Shafi,<sup>a</sup> Harish Makri Nimbegondi Kotresh,<sup>c\*</sup> Alagar Raja Kottaichamy,<sup>a</sup> Kallam Ramareddy Venugopala Reddy,<sup>d\*</sup> Musthafa Ottakam Thotiy<sup>a\*</sup>

Table S1- Comparison of vitamin-C oxidation on different electrodes

| Electrode | $E_{\text{onset}}$ (V) vs SHE | $E_{\text{peak}}$ (V) vs SHE |
|-----------|-------------------------------|------------------------------|
| Platinum  | 0.30                          | 0.70                         |
| Carbon    | 0.40                          | 0.83                         |
| CoPc      | 0.17                          | 0.40                         |

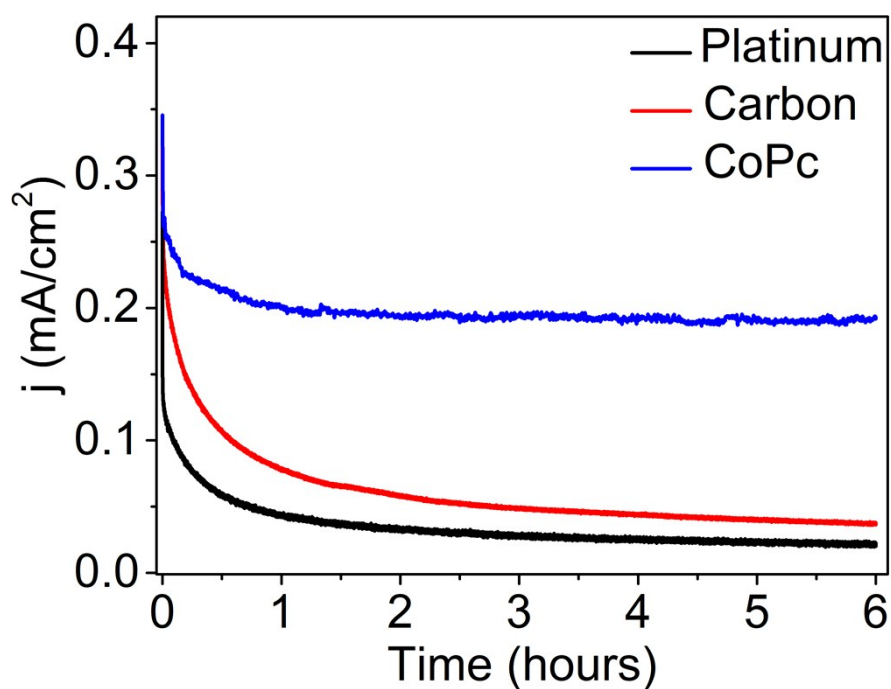

Figure S1: Chronoamperometry curves on Pt, GC, and CoPc at an overpotential of 340 mV.

Table S2- Comparison of charge transfer resistance ( $R_{\text{CT}}$ ) on different electrodes.

| Electrode | $R_{\text{CT}}$ (kohm.cm <sup>2</sup> ) |
|-----------|-----------------------------------------|
| Carbon    | 7.778                                   |
| Platinum  | 2.477                                   |
| CoPc      | 0.102                                   |

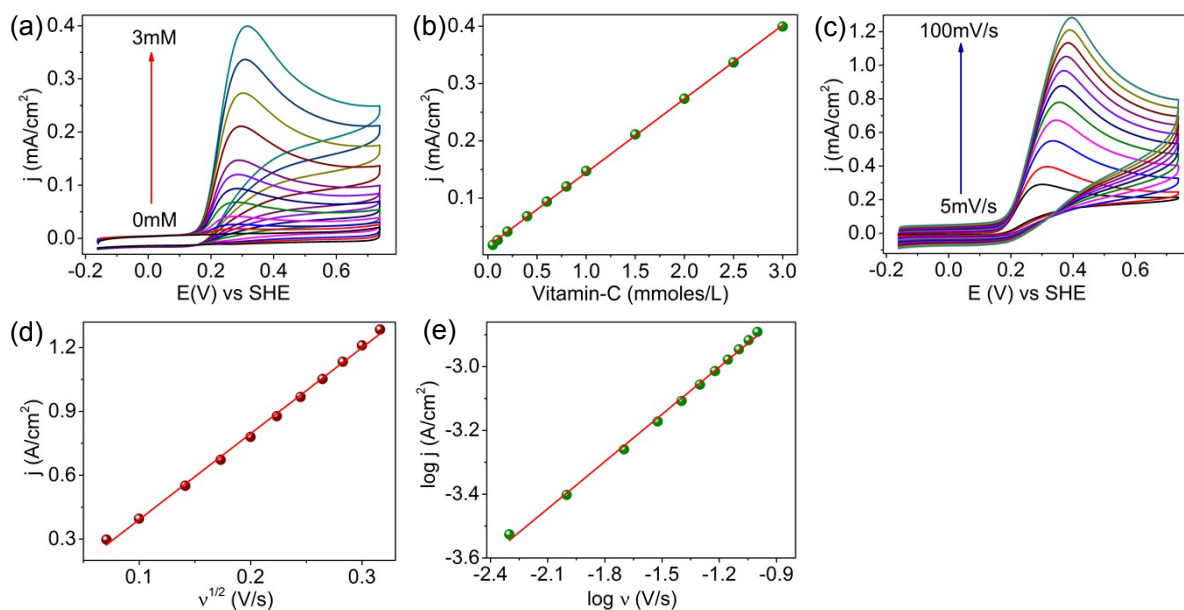

Figure S2- a) Vitamin C oxidation at different concentrations on CoPc modified carbon electrode in phosphate buffer of pH 7 at a scan rate of 10 mV/s, b) plot of peak current vs. concentration of vitamin C, c) scan rate dependence of vitamin C oxidation at 3 mM concentration on a CoPc electrode and d) plot of peak current vs. square root of scan rate, and e) plot of log (i) vs. log

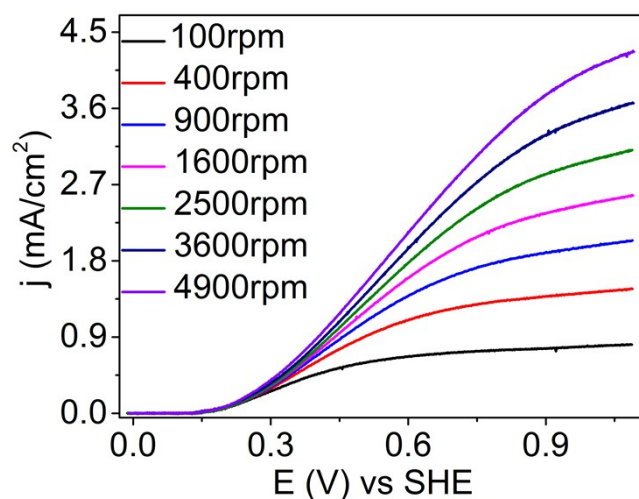

(v).

Figure S3- Rotating disk electrode measurements for vitamin C (5 mM) oxidation on a CoPc modified glassy carbon disk electrode in phosphate buffer of pH = 7.

Table S3: Rate constants and number of electrons of Vitamin C oxidation on CoPc electrode from different methods.

| Parameters                                                 | Method          | Values |
|------------------------------------------------------------|-----------------|--------|
| Number of electrons                                        | Koutecky-Levich | 2.0    |
| Rate constant $K^0 \times 10^{-4}$ (cm sec <sup>-1</sup> ) |                 | 5.1    |

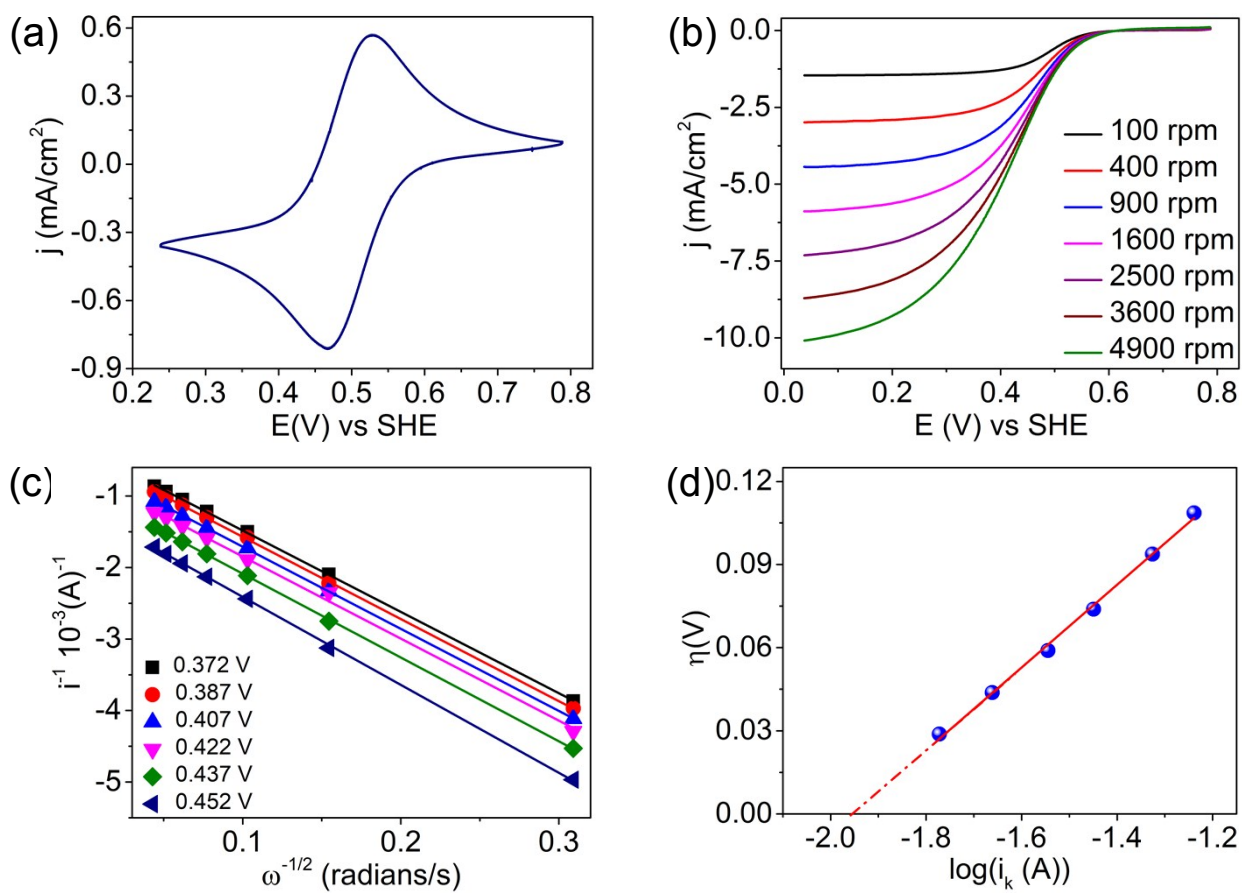

Figure S4- a) Cyclic voltammogram for the redox reaction of 10 mM ferricyanide (in phosphate buffer of pH = 7) on a glassy carbon based electrode at 10 mV/s scan rate, b) rotating disk electrode measurements for ferricyanide (10 mM in phosphate buffer of pH = 7) on a glassy carbon disk electrode, c) K-L plots at different potentials and d) plot of over potential vs. log of kinetic current.

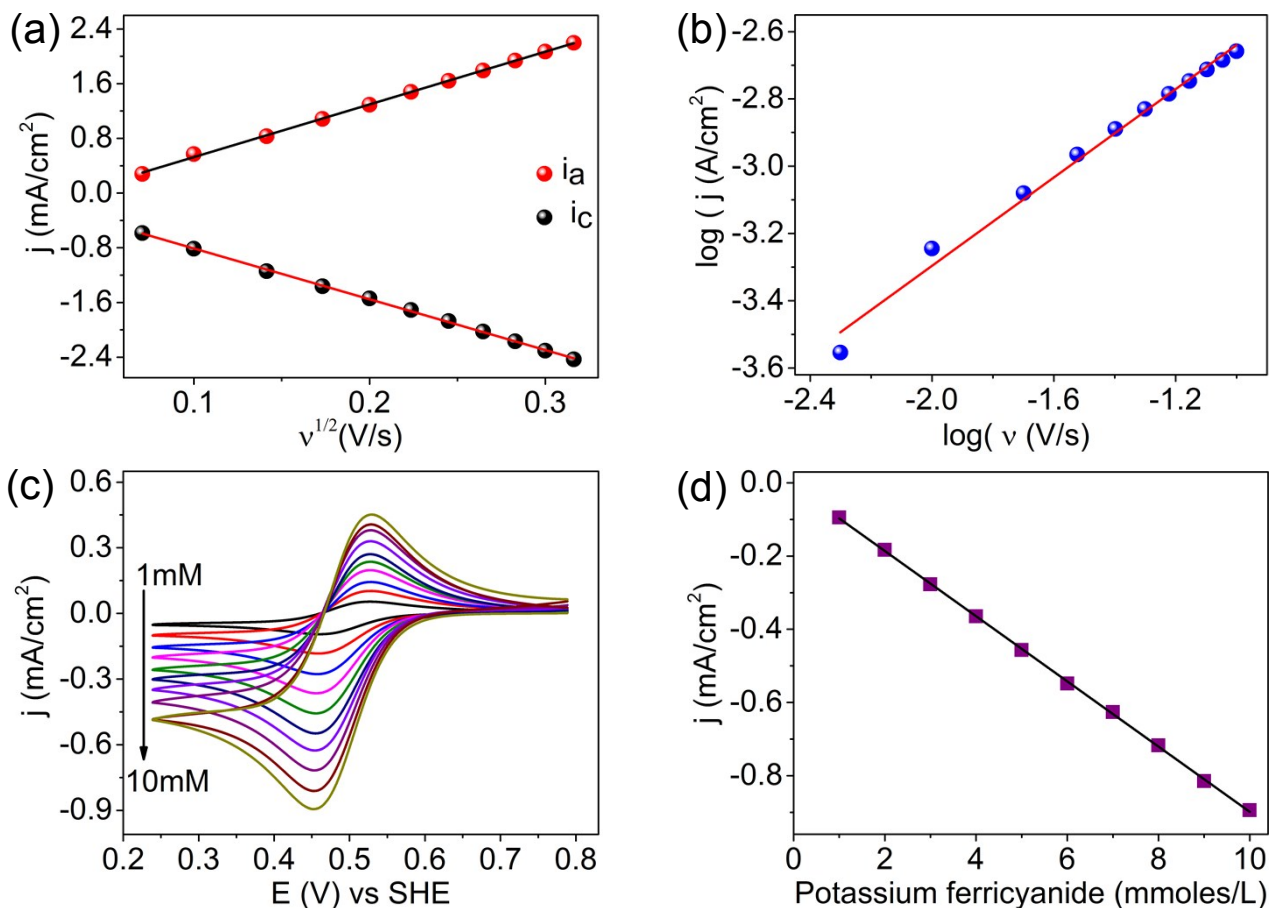

Figure S5- a) Plot of oxidation and reduction peak currents for ferricyanide (10 mM) vs. square root of scan rate, b) plot of  $\log(i)$  vs.  $\log$  of scan rate, (c) cyclic voltammogram for the redox reaction of ferricyanide at different concentration and (d) corresponding peak current vs. concentration plot.

Table S4- Rate constants and number of electrons of ferricyanide on carbon electrode from different methods.

| Method            | Rate constant $K^0 \times 10^{-2}$ ( $\text{cm sec}^{-1}$ ) | Number of electrons |
|-------------------|-------------------------------------------------------------|---------------------|
| Koutecky-Levich   | 6.0                                                         | 0.99                |
| Klinger and Kochi | 6.7                                                         |                     |
| Nicholson         | 2.8                                                         |                     |

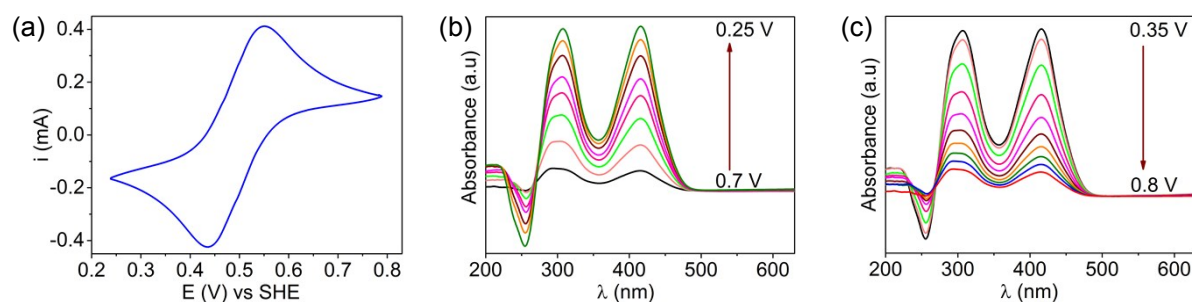

Figure S6. a) Cyclic voltammogram for ferricyanide acquired during UV-Visible spectroelectrochemistry, b) corresponding in-situ UV-Vis spectra during reductive scan and c) during oxidative scan. The spectrum of ferricyanide was taken as the background signal throughout the measurement.

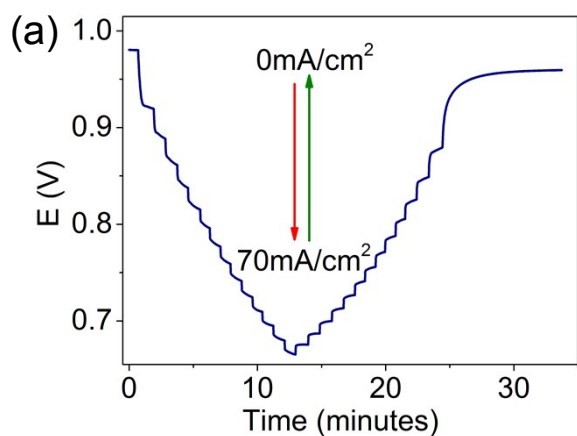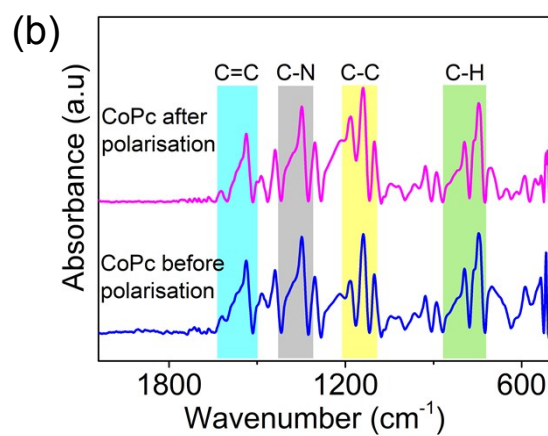

Figure S7- a) Cell voltage at different discharge current densities and b) Stability of the CoPc electrode before and after long term stability tests.
